# Supplementary material for: Genome-Wide Survey of Flavonoid Biosynthesis Genes and Gene Expression Analysis between Black- and Yellow-Seeded Brassica napus
Source: Front Plant Sci. 2016 Dec 6;7:1755. doi: 10.3389/fpls.2016.01755 (PMC5139615; doi:10.3389/fpls.2016.01755)
Supplement: Supplementary file 2 [file Table2.XLS]

## Sheet: AHA10
Genes	Species	Locus_ID	Taxa_ID	full sequence			best 1 domain			Number of domain		Length (aa)
				E-value	score	bias	E-value	score	bias	exp	N
AHA10	Aethionema arabicum	AA_scaffold4402_53	Aa_AHA10a	0	2191.1	2.6	0	2191	2.6	1	1	934
		AA_scaffold5525_52	Aa_AHA10b	0	2189.5	3.4	0	2189.3	3.4	1	1	985
	Arabidopsis halleri	Araha.2722s0008.1	Ah_AHA10	0	2188.2	2.5	0	2188	2.5	1	1	947
	Arabidopsis thaliana	AT1G17260.1	At_AHA10	0	2188	4.3	0	2187.9	4.3	1	1	947
	Brassica napus L.	BnaA08g23220D	Bn_AHA10a	0	2186.6	3	0	2186.4	3	1	1	944
		BnaC08g17280D	Bn_AHA10b	0	2175.9	4.3	0	2175.7	4.3	1	1	944
	Brassica oleracea	Bol029307	Bo_AHA10	0	2175.9	4.3	0	2175.7	4.3	1	1	944
	Brassica rapa	Bra016610	Br_AHA10	0	2159.7	2.8	0	2159.6	2.8	1	1	944
	Boechera stricta	Bostr.7128s0336.1	Bs_AHA10	0	2169.7	2	0	2169.5	2	1	1	947
	Capsella grandiflora	Cagra.0824s0094.1	Cg_AHA10	0	2156.8	3.8	0	2156.6	3.8	1	1	947
	Capsella rubella	Carubv10008225m	Cr_AHA10	0	2155.6	3.3	0	2155.4	3.3	1	1	947
	Camelina sativa	Csa03g021030.1	Cs_AHA10a	0	2145.7	0.2	0	2145.6	0.2	1	1	925
		Csa14g021480.1	Cs_AHA10b	0	2132.7	1.3	0	2132.5	1.3	1	1	918
		Csa17g022960.1	Cs_AHA10c	0	2118.7	2.9	0	2118.6	2.9	1	1	970
	Leavenworthia alabamica	LA_scaffold951_17	La_AHA10	0	2091	4.4	0	2090.9	4.4	1	1	991
	Raphanus sativus L.	Rsa1.0_00153.1_g00022.1	Rs_AHA10	0	2076.5	3.4	0	2076.4	3.4	1	1	944
	Sisymbrium irio	SI_scaffold1491_231	Si_AHA10	0	2003	10.3	0	1997.7	10.3	2	1	957
	Schrenkiella parvula	c0001_01342	Sp_AHA10	0	2157.8	3.5	0	2157.6	3.5	1	1	953
	Thellungiella halophila	Thhalv10006710m	Th_AHA10	0	1673.7	2.2	0	1673.4	2.2	1	1	954
	Thellungiella salsuginea	Tsa1g15420	Ts_AHA10	0	1673.1	0.3	0	1672.8	0.3	1	1	954

## Sheet: Table S1
Supplementary Table S2 Identification of multiple gene superfamily members associated with the flavonoid biosynthesis pathway in Brassicaceae species
Gene type	Species	Locus_ID	Taxa_ID	full sequence			best 1 domain			Number of domain		Length (aa)
				E-value	score	bias	E-value	score	bias	exp	N
PAL	Aethionema arabicum	AA_scaffold5205_14	Aa_PAL1	0	1542.2	0.2	0	1542.1	0.2	1	1	723
		AA_scaffold3630_103	Aa_PAL4	0	1470.6	0	0	1470.4	0	1	1	705
	Arabidopsis halleri	Araha.13521s0005.1	Ah_PAL1	8.7e-270	901.8	0.1	9.8e-270	901.6	0.1	1	1	396
		Araha.0418s0003.1	Ah_PAL2	1.7e-254	851.2	0	1.9e-254	851	0	1	1	377
		Araha.5942s0009.1	Ah_PAL4a	5.8e-209	700.7	0.6	1e-160	541.3	0.1	2	2	346
		Araha.5942s0009.2	Ah_PAL4b	1.2e-210	706.3	0.9	1.7e-162	547.1	0.1	2	2	344
	Arabidopsis lyrata	Al16034633	Al_PAL1	0	1561.7	0.2	0	1561.5	0.2	1	1	725
		Al16046425	Al_PAL2	0	1554.1	0.1	0	1553.9	0.1	1	1	717
		Al16037286	Al_PAL3	0	1385	0	0	1384.9	0	1	1	696
		Al16056942	Al_PAL4	0	1503.8	0	0	1503.7	0	1	1	705
	Arabidopsis thaliana	AT2G37040.1	At_PAL1	0	1561.4	0.2	0	1561.2	0.2	1	1	725
		AT3G53260.1	At_PAL2	0	1554.8	0.1	0	1554.6	0.1	1	1	717
		AT5G04230.1	At_PAL3a	0	1371.1	0	0	1370.8	0	1	1	694
		AT5G04230.2	At_PAL3b	0	1363	0	0	1362.7	0	1	1	698
		AT3G10340.1	At_PAL4	0	1509.6	0	0	1509.4	0	1	1	707
	Brassica napus L.	BnaC04g08190D	Bn_PAL1a	1.4e-213	715.9	5.9	6.5e-130	439.4	0.2	2	2	380
		BnaA04g21240D	Bn_PAL1b	2.8e-136	460.4	0.4	3.4e-136	460.2	0.4	1	1	263
		BnaA04g21230D	Bn_PAL1c	8.6e-289	964.6	0	9.6e-289	964.4	0	1	1	423
		BnaA05g07370D	Bn_PAL1d	1.7e-214	719	6.2	6.6e-131	442.7	0.2	2	2	380
		BnaA04g04830D	Bn_PAL2a	0	1089.7	6.2	0	1037.9	0.7	2	2	522
		BnaA07g16060D	Bn_PAL2b	0	1020.2	14.5	5.4e-289	965.2	6.8	3	2	491
		BnaA09g33560D	Bn_PAL2c	0	1030.6	13.2	1.1e-220	739.4	0.3	3	3	496
		BnaC08g24360D	Bn_PAL2d	0	1027.3	12.7	1.1e-220	739.4	0.3	3	3	496
		BnaCnng52250D	Bn_PAL2e	0	1098.4	7	0	1047	1	2	2	519
		BnaC04g33780D	Bn_PAL3a	0	1099.8	0	0	1099.7	0	1	1	547
		BnaA04g11940D	Bn_PAL3b	0	1355.1	0	0	1354.9	0	1	1	698
		BnaA05g28470D	Bn_PAL4a	0	1501.8	0	0	1501.6	0	1	1	706
		BnaC05g42780D	Bn_PAL4b	0	1495.3	0	0	1495.1	0	1	1	706
	Brassica oleracea	Bol037689	Bo_PAL1a	0	1557.5	0.1	0	1557.3	0.1	1	1	722
		Bol025522	Bo_PAL1b	0	1563.7	0.1	0	1563.6	0.1	1	1	719
		Bol005084	Bo_PAL2a	0	1566.2	0.2	0	1566	0.2	1	1	724
		Bol005411	Bo_PAL2b	0	1556.3	0.2	0	1556.1	0.2	1	1	718
		Bol025102	Bo_PAL2c	0	1568.1	0.1	0	1567.9	0.1	1	1	723
		Bol041738	Bo_PAL2d	0	1566.2	0.2	0	1566	0.2	1	1	724
		Bol005493	Bo_PAL3a	6.3e-66	227.9	0.1	1.7e-64	223.2	0	1.9	2	191
		Bol006745	Bo_PAL3b	0	1103	0	0	1102.8	0	1	1	547
		Bol011375	Bo_PAL4	0	1497	0	0	1496.8	0	1	1	706
	Brassica rapa	Bra005221	Br_PAL1a	3.4e-216	724.6	6.2	6.1e-133	449.4	0.2	2	2	371
		Bra017210	Br_PAL1b	0	1559.1	0.1	0	1558.9	0.1	1	1	722
		Bra006985	Br_PAL2a	0	1513.1	0	0	1512.9	0	1	1	706
		Bra003126	Br_PAL2b	0	1554.5	0.2	0	1554.4	0.2	1	1	707
		Bra039777	Br_PAL2c	5.9e-302	1008.1	4	1.4e-285	954	0.2	2	2	510
		Bra028793	Br_PAL3a	5.9e-105	356.9	1.4	5.7e-50	175.1	0.1	3	3	294
		Bra030322	Br_PAL3b	0	1348.5	0	0	1348.4	0	1	1	698
		Bra029831	Br_PAL4	0	1505.6	0	0	1505.4	0	1	1	706
	Boechera stricta	Bostr.23794s0386.1	Bs_PAL1	0	1555.9	0.1	0	1555.7	0.1	1	1	725
		Bostr.16346s0001.1	Bs_PAL2a	0	1018.1	0	0	1018	0	1	1	449
		Bostr.2983s0065.1	Bs_PAL2b	0	1063	0	0	1062.9	0	1	1	475
		Bostr.22252s0030.1	Bs_PAL4a	0	1506.8	0	0	1506.6	0	1	1	709
		Bostr.22252s0030.2	Bs_PAL4b	0	1512.7	0	0	1512.5	0	1	1	707
	Capsella grandiflora	Cagra.0666s0041.1	Cg_PAL1	0	1555.3	0.2	0	1555.2	0.2	1	1	726
		Cagra.0612s0051.1	Cg_PAL2	0	1556	0.1	0	1555.8	0.1	1	1	718
		Cagra.0834s0049.1	Cg_PAL4	0	1500.4	0	0	1500.2	0	1	1	704
	Capsella rubella	Carubv10022721m	Cr_PAL1	0	1555.4	0.2	0	1555.2	0.2	1	1	726
		Carubv10016752m	Cr_PAL2	0	1550.5	0.2	0	1550.3	0.2	1	1	718
		Carubv10013086m	Cr_PAL4	0	1496.1	0	0	1495.9	0	1	1	704
	Camelina sativa	Csa04g050600.1	Cs_PAL1a	0	1537.2	0.3	0	1537.1	0.3	1	1	728
		Csa05g016810.1	Cs_PAL1b	0	1560.7	0.3	0	1560.5	0.3	1	1	726
		Csa06g039710.1	Cs_PAL1c	0	1563.6	0.2	0	1563.5	0.2	1	1	727
		Csa04g039260.1	Cs_PAL2a	0	1552.1	0.1	0	1552	0.1	1	1	718
		Csa06g027730.1	Cs_PAL2b	0	1556	0.1	0	1555.8	0.1	1	1	718
		Csa07g019870.1	Cs_PAL2c	1.7e-264	884.3	1	5.8e-149	502.4	0.2	2	2	417
		Csa09g061550.1	Cs_PAL2d	0	1550.7	0.1	0	1550.5	0.1	1	1	718
		Csa01g011180.1	Cs_PAL4a	0	1493.6	0	0	1493.4	0	1	1	706
		Csa15g012820.1	Cs_PAL4b	0	1405.8	0	0	1380	0	2	2	671
		Csa19g013900.1	Cs_PAL4c	0	1104	0.7	0	1103.9	0.7	1	1	509
	Leavenworthia alabamica	LA_scaffold1511_42	La_PAL1a	0	1483.2	0.3	0	1483	0.3	1	1	709
		LA_scaffold2598_15	La_PAL1b	0	1550.9	0.3	0	1550.7	0.3	1	1	718
		LA_scaffold547_22	La_PAL1c	0	1545.9	0.2	0	1545.7	0.2	1	1	722
		LA_scaffold573_130	La_PAL2a	0	1512.7	0.2	0	1512.5	0.2	1	1	681
		LA_scaffold1739_2	La_PAL2b	9.8e-229	766.1	3.8	2.4e-163	549.9	0.2	2	2	428
	Raphanus sativus L.	Rsa1.0_00707.1_g00016.1	Rs_PAL1a	0	1434.9	0.3	0	1434.7	0.3	1	1	657
		Rsa1.0_00788.1_g00004.1	Rs_PAL1b	0	1461.3	0.4	0	1415.2	0.1	2	2	685
		Rsa1.0_00143.1_g00011.1	Rs_PAL2a	0	1568.3	0.1	0	1568	0.1	1	1	724
		Rsa1.0_01134.1_g00002.1	Rs_PAL2b	0	1564.2	0.1	0	1564.1	0.1	1	1	707
		Rsa1.0_00416.1_g00004.1	Rs_PAL4	0	1471.2	0	0	1471	0	1	1	702
	Sisymbrium irio	SI_scaffold2568_3	Si_PAL1	0	1562.9	0.2	0	1562.7	0.2	1	1	722
		SI_scaffold1607_9	Si_PAL2	0	1567	0.3	0	1566.8	0.3	1	1	724
		SI_scaffold123_278	Si_PAL3	1.8e-25	94.1	0	2.1e-25	93.9	0	1	1	107
		SI_scaffold30_107	Si_PAL4	0	1380.7	0.1	0	1379.8	0.1	1.4	1	695
	Schrenkiella parvula	c0004_01049	Sp_PAL1	0	1547.1	0.1	0	1546.9	0.1	1	1	722
		c0007_00702	Sp_PAL2	0	1543.8	0	0	1543.6	0	1	1	705
		c0005_00833	Sp_PAL4	0	1483.9	0	0	1483.8	0	1	1	705
	Thellungiella halophila	Thhalv10016314m	Th_PAL1	0	1561.8	0.2	0	1561.7	0.2	1	1	724
		Thhalv10010153m	Th_PAL2	0	1555.5	0.1	0	1555.3	0.1	1	1	725
		Thhalv10020168m	Th_PAL4a	0	1507.9	0	0	1507.8	0	1	1	708
		Thhalv10020170m	Th_PAL4b	0	1513.8	0	0	1513.6	0	1	1	706
	Thellungiella salsuginea	Tsa4g22230	Ts_PAL1	0	1561.9	0.2	0	1561.7	0.2	1	1	717
		Tsa5g09610	Ts_PAL2	0	1555.5	0.1	0	1555.3	0.1	1	1	725
		Tsa3g08600	Ts_PAL4	0	1513.8	0	0	1513.6	0	1	1	706
	Brassica juncea	ACX31148.1	Bj_PAL1	/	/	/	/	/	/	/	/	635
C4H	Aethionema arabicum	AA_scaffold6649_12	Aa_C4H	0	1095.5	0	0	1095.2	0	1.1	1	1197
	Arabidopsis halleri	Araha.1192s0001.1	Ah_C4H	0	1074.7	0.2	0	1074.5	0.2	1	1	468
	Arabidopsis lyrata	Al16057202	Al_C4H	0	1154.9	0.3	0	1154.7	0.3	1	1	505
	Arabidopsis thaliana	AT2G30490.1	At_C4H	0	1146.5	0.2	0	1146.3	0.2	1	1	505
	Brassica napus L.	BnaA03g14000D	Bn_C4Ha	0	1093	0.3	0	1092.8	0.3	1	1	503
		BnaA03g14010D	Bn_C4Hb	0	1153.1	0.2	0	1152.9	0.2	1	1	505
		BnaA04g17560D	Bn_C4Hc	0	1111	0.1	0	1110.9	0.1	1	1	505
		BnaA04g17570D	Bn_C4Hd	0	1144.6	0.4	0	1144.5	0.4	1	1	505
		BnaA05g11950D	Bn_C4He	0	1155.1	0.2	0	1154.9	0.2	1	1	505
		BnaC03g16950D	Bn_C4Hf	0	1049.9	0.5	0	1049.6	0.5	1	1	481
		BnaC03g16960D	Bn_C4Hg	0	1149.4	0.1	0	1149.3	0.1	1	1	505
		BnaC04g14330D	Bn_C4Hh	0	1154.1	0.2	0	1153.9	0.2	1	1	505
		BnaC04g41120D	Bn_C4Hi	0	1103.5	0.2	0	1103.3	0.2	1	1	505
		BnaC04g41130D	Bn_C4Hj	0	1142	0.4	0	1141.9	0.4	1	1	505
	Brassica oleracea	Bol004608	Bo_C4Ha	0	1049.9	0.5	0	1049.6	0.5	1	1	481
		Bol004610	Bo_C4Hb	0	1149.4	0.1	0	1149.3	0.1	1	1	505
		Bol006704	Bo_C4Hc	0	1151.8	0	0	1151.6	0	1.1	1	1165
		Bol033347	Bo_C4Hd	0	1101.8	0.3	0	1101.6	0.3	1	1	505
		Bol033349	Bo_C4He	0	1144	0.3	0	1143.9	0.3	1	1	505
	Brassica rapa	Bra018311	Br_C4Ha	0	1152.8	0.2	0	1152.7	0.2	1	1	505
		Bra021636	Br_C4Hb	0	1109.7	0.1	0	1109.5	0.1	1	1	505
		Bra021637	Br_C4Hc	0	1138.7	0.3	0	1138.5	0.3	1	1	505
		Bra022802	Br_C4Hd	0	1083.2	0.2	0	1083	0.2	1	1	503
		Bra022803	Br_C4He	0	1142.6	0.1	0	1142.4	0.1	1	1	505
	Boechera stricta	Bostr.24513s0188.1	Bs_C4H	0	1154.2	0.5	0	1154	0.5	1	1	505
	Capsella grandiflora	Cagra.0567s0013.1	Cg_C4H	4.8e-249	832.3	1.2	5.5e-249	832.2	1.2	1	1	359
	Capsella rubella	Carubv10023044m	Cr_C4H	0	1151.7	0.4	0	1151.5	0.4	1	1	506
	Camelina sativa	Csa05g032270.1	Cs_C4Ha	0	1154	0.3	0	1153.9	0.3	1	1	506
		Csa07g012660.1	Cs_C4Hb	0	1152.9	0.3	0	1152.7	0.3	1	1	506
		Csa16g014410.1	Cs_C4Hc	0	1152.9	0.3	0	1152.7	0.3	1	1	506
	Leavenworthia alabamica	LA_scaffold1778_28	La_C4Ha	0	1148.3	0.2	0	1148.2	0.2	1	1	506
		LA_scaffold2430_38	La_C4Hb	0	1118.8	0.5	0	1118.6	0.5	1	1	506
	Raphanus sativus L.	Rsa1.0_01254.1_g00001.1	Rs_C4Ha	0	1102.4	0.1	0	1102.2	0.1	1	1	505
		Rsa1.0_04237.1_g00002.1	Rs_C4Hb	0	1142.4	0.1	0	1142.3	0.1	1	1	505
		Rsa1.0_07813.1_g00001.1	Rs_C4Hc	0	1140.3	0.5	0	1140.1	0.5	1	1	505
	Sisymbrium irio	SI_scaffold154_66	Si_C4Ha	0	1103.3	0.2	0	1103.1	0.2	1	1	505
		SI_scaffold154_67	Si_C4Hb	0	1153.1	0.3	0	1152.9	0.3	1	1	505
	Schrenkiella parvula	c0004_01664	Sp_C4Ha	0	1136	0.1	0	1135.8	0.1	1	1	505
		c0004_01665g	Sp_C4Hb	2.3e-269	899.4	9	2.7e-178	599	5.7	2.1	2	942
	Thellungiella halophila	Thhalv10016544m	Th_C4Ha	0	1105	0.1	0	1104.9	0.1	1	1	505
		Thhalv10016545m	Th_C4Hb	0	1157.8	0.2	0	1157.6	0.2	1	1	505
	Thellungiella salsuginea	Tsa4g15090	Ts_C4Ha	0	1157.8	0.2	0	1157.6	0.2	1	1	505
		Tsa4g15100	Ts_C4Hb	0	1064.8	0.1	0	1064.6	0.1	1	1	494
TT1	Aethionema arabicum	AA_scaffold1481_55	Aa_TT1	4.5e-168	563.3	3.1	5.1e-168	563.1	3.1	1	1	301
	Arabidopsis halleri	Araha.5541s0001.1	Ah_TT1	5.4e-199	664.8	2.5	6.1e-199	664.7	2.5	1	1	301
	Arabidopsis lyrata	Al16063311	Al_TT1	7.8e-200	667.6	3.2	8.7e-200	667.4	3.2	1	1	301
	Arabidopsis thaliana	AT1G34790.1	At_TT1	6.2e-197	658.1	2	6.9e-197	657.9	2	1	1	303
	Brassica napus L.	BnaAnng02100D	Bn_TT1a	6.9e-187	625.1	5	7.7e-187	624.9	5	1	1	287
		BnaC06g08390D	Bn_TT1b	4.9e-188	628.8	3.5	5.5e-188	628.7	3.5	1	1	287
	Brassica oleracea	Bol015699	Bo_TT1	1.9e-187	626.9	3.8	2.1e-187	626.7	3.8	1	1	287
	Brassica rapa	Bra028067	Br_TT1	1.5e-187	627.3	5.5	1.6e-187	627.1	5.5	1	1	287
	Boechera stricta	Bostr.1040s0072.1	Bs_TT1	4.6e-200	668.3	3.1	5.1e-200	668.2	3.1	1	1	300
	Capsella grandiflora	Cagra.0764s0003.1	Cg_TT1	3.4e-186	622.8	5.5	3.8e-186	622.6	5.5	1	1	296
	Capsella rubella	Carubv10012266m	Cr_TT1	1.5e-186	623.9	4.6	1.7e-186	623.8	4.6	1	1	297
	Camelina sativa	Csa03g038710.1	Cs_TT1a	2.2e-195	652.9	3	2.5e-195	652.8	3	1	1	296
		Csa14g044470.1	Cs_TT1b	4.5e-195	651.9	3.6	5.1e-195	651.8	3.6	1	1	294
		Csa17g062250.1	Cs_TT1c	4.5e-195	652	3.2	5e-195	651.8	3.2	1	1	295
	Leavenworthia alabamica	LA_scaffold112_10	La_TT1	1.3e-167	561.8	9.6	4.5e-167	560	9.6	1.7	1	304
	Raphanus sativus L.	Rsa1.0_02639.1_g00001.1	Rs_TT1	3.4e-185	619.5	3.3	3.9e-185	619.3	3.3	1	1	287
	Sisymbrium irio	SI_C224375_2	Si_TT1	5.6e-197	658.2	3.2	6.4e-197	658	3.2	1	1	323
	Schrenkiella parvula	c0001_02671	Sp_TT1	3e-200	669	2.5	3.3e-200	668.8	2.5	1	1	301
	Thellungiella halophila	Thhalv10001872m	Th_TT1	6e-195	651.5	4.4	6.7e-195	651.4	4.4	1	1	297
	Thellungiella salsuginea	Tsa6g08660	Ts_TT1	5.9e-195	651.5	4.4	6.6e-195	651.4	4.4	1	1	297
TT2	Aethionema arabicum	AA_scaffold6584_2	Aa_TT2	1.1e-120	407.1	4.6	1.4e-120	406.8	4.6	1.1	1	243
	Arabidopsis halleri	Araha.34424s0001.1	Ah_TT2	6.3e-159	532.5	3.9	7e-159	532.3	3.9	1	1	261
	Arabidopsis lyrata	Al16059150	Al_TT2	2.4e-157	527.3	4.4	2.7e-157	527.1	4.4	1	1	261
	Arabidopsis thaliana	AT5G35550.1	At_TT2	1.5e-157	527.9	3.3	1.7e-157	527.8	3.3	1	1	258
	Brassica napus L.	BnaA08g29930D	Bn_TT2a	2.4e-152	510.9	5	2.8e-152	510.7	5	1	1	261
		BnaC08g07960D	Bn_TT2b	9.7e-152	508.9	5.7	1.1e-151	508.7	5.7	1	1	261
	Brassica oleracea	Bol014029	Bo_TT2	3.5e-153	513.6	5.6	3.9e-153	513.5	5.6	1	1	259
	Brassica rapa	Bra035532	Br_TT2	8.7e-154	515.6	5	9.9e-154	515.4	5	1	1	260
	Boechera stricta	Bostr.29044s0068.1	Bs_TT2	4.2e-157	526.5	3.1	4.7e-157	526.3	3.1	1	1	261
	Capsella grandiflora	Cagra.5428s0005.1	Cg_TT2	1.7e-154	517.9	4	1.9e-154	517.7	4	1	1	263
	Capsella rubella	Carubv10006684m	Cr_TT2	7.1e-155	519.2	3.4	8e-155	519	3.4	1	1	263
	Camelina sativa	Csa10g039800.1	Cs_TT2a	1.1e-59	207.1	5.9	1.8e-59	206.5	4.9	1.6	1	156
		Csa11g044930.1	Cs_TT2b	6.7e-154	516	1.1	7.5e-154	515.8	1.1	1	1	261
		Csa12g069680.1	Cs_TT2c	1.6e-153	514.8	1.8	1.8e-153	514.6	1.8	1	1	261
	Leavenworthia alabamica	LA_scaffold3615_5	La_TT2	1.9e-149	501.4	7.9	2.1e-149	501.3	7.9	1	1	257
	Raphanus sativus L.	Rsa1.0_00463.1_g00020.1	Rs_TT2	3.7e-147	493.9	3.7	4.5e-147	493.6	3.7	1	1	258
	Sisymbrium irio	SI_scaffold1543_1	Si_TT2	5.8e-158	529.3	4.9	6.5e-158	529.1	4.9	1	1	261
	Schrenkiella parvula	c0019_00102	Sp_TT2	4.6e-157	526.4	5.3	5.1e-157	526.2	5.3	1	1	265
	Thellungiella halophila	Thhalv10003461m	Th_TT2	3.5e-160	536.6	5.5	3.9e-160	536.4	5.5	1	1	265
	Thellungiella salsuginea	Tsa7g08020	Ts_TT2	3.5e-160	536.6	5.5	3.9e-160	536.4	5.5	1	1	265
TT3	Aethionema arabicum	AA_scaffold6247_64	Aa_TT3	5.9e-228	761.7	1.1	6.5e-228	761.6	1.1	1	1	382
	Arabidopsis halleri	Araha.23939s0001.1	Ah_TT3	1.8e-179	602.2	0.1	2e-179	602	0.1	1	1	278
	Arabidopsis lyrata	Al16053507	Al_TT3a	3.1e-255	851.5	0	3.5e-255	851.3	0	1	1	384
		Al16064053	Al_TT3b	2.5e-256	855.1	0.1	2.8e-256	855	0.1	1	1	384
	Arabidopsis thaliana	AT5G42800.1	At_TT3	6.9e-253	843.8	0.1	7.7e-253	843.6	0.1	1	1	382
	Brassica napus L.	BnaA09g15710D	Bn_TT3a	3.1e-259	864.7	0.2	3.5e-259	864.5	0.2	1	1	385
		BnaC09g17150D	Bn_TT3b	1.4e-257	859.3	0.1	1.6e-257	859.1	0.1	1	1	385
		BnaC02g28770D	Bn_TT3c	1.1e-102	349.3	10.6	4.3e-56	196	0	3	3	244
	Brassica oleracea	Bol035269	Bo_TT3	9.2e-259	863.1	0.2	1e-258	863	0.2	1	1	385
	Brassica rapa	Bra027457	Br_TT3	3.1e-259	864.7	0.2	3.5e-259	864.5	0.2	1	1	385
	Boechera stricta	Bostr.3148s0211.1	Bs_TT3	2e-256	855.5	0	2.2e-256	855.3	0	1	1	384
	Capsella grandiflora	Cagra.0503s0010.1	Cg_TT3	1.8e-252	842.5	0.3	2e-252	842.3	0.3	1	1	386
	Capsella rubella	Carubv10027976m	Cr_TT3	3.6e-230	769	0.2	4e-230	768.9	0.2	1	1	326
	Camelina sativa	Csa11g072200.1	Cs_TT3a	6.5e-250	834	0.1	7.3e-250	833.8	0.1	1	1	377
		Csa18g011120.1	Cs_TT3b	3.3e-248	828.4	0.2	3.7e-248	828.2	0.2	1	1	377
		Csa20g066600.1	Cs_TT3c	3.5e-247	825	0.3	3.9e-247	824.9	0.3	1	1	377
	Leavenworthia alabamica	LA_scaffold1608_17	La_TT3	4.7e-249	831.2	0.3	5.3e-249	831	0.3	1	1	387
	Raphanus sativus L.	Rsa1.0_01236.1_g00008.1	Rs_TT3	2.9e-254	848.4	0.1	3.2e-254	848.2	0.1	1	1	387
	Sisymbrium irio	SI_scaffold54_32	Si_TT3	2.9e-256	854.9	0.2	3.3e-256	854.7	0.2	1	1	384
	Schrenkiella parvula	c0003_02132	Sp_TT3	8.7e-253	843.5	0	9.8e-253	843.3	0	1	1	384
	Thellungiella halophila	Thhalv10003227m	Th_TT3a	2.4e-250	835.4	0.2	2.7e-250	835.3	0.2	1	1	383
		Thhalv10003228m	Th_TT3b	6.7e-252	840.6	0.2	7.5e-252	840.4	0.2	1	1	382
	Thellungiella salsuginea	Tsa2g10050	Ts_TT3	6.6e-252	840.6	0.2	7.4e-252	840.4	0.2	1	1	382
	Brassica juncea	ADB45307.1	Bj_TT3	/	/	/	/	/	/	/	/	385
TT4	Aethionema arabicum	AA_scaffold6466_21	Aa_TT4	2.6e-261	871.6	0	5.7e-261	870.5	0	1.6	1	734
	Arabidopsis lyrata	Al16043947	Al_TT4	2.7e-265	884.7	0	3e-265	884.5	0	1	1	396
	Arabidopsis thaliana	AT5G13930.1	At_TT4	1.9e-266	888.5	0	2.1e-266	888.4	0	1	1	395
	Brassica napus L.	BnaA02g30320D	Bn_TT4a	1.5e-260	869	0	1.7e-260	868.9	0	1	1	394
		BnaA03g04590D	Bn_TT4b	2.4e-266	888.1	0	2.7e-266	888	0	1	1	394
		BnaA10g19670D	Bn_TT4c	1.7e-267	891.9	0	1.9e-267	891.8	0	1	1	395
		BnaC02g05070D	Bn_TT4d	8.6e-266	886.3	0	9.6e-266	886.2	0	1	1	396
		BnaC02g38710D	Bn_TT4e	4e-229	765.6	0	8.1e-229	764.6	0	1.5	1	418
		BnaC02g38730D	Bn_TT4f	2.1e-257	858.7	0	2.3e-257	858.6	0	1	1	394
		BnaC03g06120D	Bn_TT4g	7.6e-267	889.8	0	8.5e-267	889.6	0	1	1	396
		BnaC09g43250D	Bn_TT4h	2.7e-267	891.3	0	3e-267	891.1	0	1	1	395
		BnaCnng01290D	Bn_TT4i	1.4e-246	823.1	0	1.7e-246	822.8	0	1	1	410
	Brassica oleracea	Bol004244	Bo_TT4a	1.6e-265	885.4	0	1.8e-265	885.2	0	1	1	396
		Bol034259	Bo_TT4b	7.6e-267	889.8	0	8.5e-267	889.6	0	1	1	396
		Bol043396	Bo_TT4c	5.3e-267	890.3	0	5.9e-267	890.2	0	1	1	395
	Brassica rapa	Bra006224	Br_TT4a	4.2e-265	884.1	0	4.7e-265	883.9	0	1	1	396
		Bra008792	Br_TT4b	5.9e-267	890.2	0	6.6e-267	890	0	1	1	395
		Bra020688	Br_TT4c	1e-259	866.4	0	1.1e-259	866.2	0	1	1	394
		Bra023441	Br_TT4d	1.1e-261	872.9	0	1.2e-261	872.7	0	1	1	394
		Bra036307	Br_TT4e	3.1e-256	854.9	0	3.4e-256	854.7	0	1	1	393
	Boechera stricta	Bostr.2902s0128.1	Bs_TT4	1e-265	886.1	0	1.1e-265	885.9	0	1	1	395
	Capsella grandiflora	Cagra.5588s0022.1	Cg_TT4	6e-267	890.1	0	6.8e-267	890	0	1	1	395
	Camelina sativa	Csa08g005910.1	Cs_TT4a	3.8e-265	884.2	0	4.3e-265	884	0	1	1	395
		Csa13g016660.1	Cs_TT4b	1.3e-265	885.7	0	1.5e-265	885.5	0	1	1	395
		Csa20g019350.1	Cs_TT4c	1.1e-264	882.7	0	1.2e-264	882.5	0	1	1	395
	Leavenworthia alabamica	LA_scaffold1112_3	La_TT4a	1.9e-240	802.9	2.1	2.2e-129	437.2	0.1	2	2	369
		LA_scaffold1846_40	La_TT4b	6.9e-267	890	0	7.7e-267	889.8	0	1	1	395
		LA_scaffold3159_5	La_TT4c	1.4e-264	882.3	0	1.6e-264	882.1	0	1	1	395
	Raphanus sativus L.	Rsa1.0_00959.1_g00008.1	Rs_TT4a	1.9e-267	891.8	0	2.1e-267	891.7	0	1	1	395
		Rsa1.0_01387.1_g00005.1	Rs_TT4b	2.4e-257	858.6	0	2.6e-257	858.4	0	1	1	394
		Rsa1.0_01836.1_g00007.1	Rs_TT4c	8.6e-267	889.6	0	9.6e-267	889.5	0	1	1	396
		Rsa1.0_08326.1_g00002.1	Rs_TT4d	4e-265	884.1	0	4.4e-265	884	0	1	1	396
	Sisymbrium irio	SI_scaffold688_221	Si_TT4a	1.2e-253	846.3	0	1.4e-253	846.2	0	1	1	394
		SI_scaffold688_222	Si_TT4b	1.3e-246	823.2	0	1.5e-246	823	0	1	1	394
		SI_scaffold843_425	Si_TT4c	3.2e-266	887.8	0	3.5e-266	887.6	0	1	1	395
	Schrenkiella parvula	c0002_01590	Sp_TT4a	1.1e-265	886	0	1.2e-265	885.8	0	1	1	395
		c0003_01083	Sp_TT4b	7.1e-251	837.2	0	8e-251	837.1	0	1	1	395
	Thellungiella halophila	Thhalv10013745m	Th_TT4	2.4e-267	891.5	0	2.6e-267	891.3	0	1	1	395
	Thellungiella salsuginea	Tsa6g32950	Ts_TT4	2.3e-267	891.5	0	2.6e-267	891.3	0	1	1	395
TT5	Aethionema arabicum	AA_C165207_1	Aa_TT5	1.5e-127	429.1	1.1	1.6e-127	429	1.1	1	1	239
	Arabidopsis halleri	Araha.2258s0004.1	Ah_TT5	1.8e-147	494.3	2.1	2e-147	494.2	2.1	1	1	244
	Arabidopsis lyrata	Al16050352	Al_TT5	6.3e-147	492.5	2	7e-147	492.4	2	1	1	244
	Arabidopsis thaliana	AT3G55120.1	At_TT5	3.2e-146	490.2	1.3	3.5e-146	490.1	1.3	1	1	246
	Brassica napus L.	BnaA07g37900D	Bn_TT5a	6.6e-113	381.1	1.7	7.9e-113	380.9	1.7	1	1	199
		BnaA09g34840D	Bn_TT5b	1e-148	498.4	0.7	1.2e-148	498.2	0.7	1	1	252
		BnaC08g26010D	Bn_TT5c	7.6e-150	502.1	0.7	8.8e-150	501.9	0.7	1	1	251
		BnaCnng45660D	Bn_TT5d	1.7e-127	428.9	9.6	1.3e-125	422.8	9.6	2	1	227
	Brassica oleracea	Bol008652	Bo_TT5a	6.5e-150	502.3	0.7	7.4e-150	502.1	0.7	1	1	252
		Bol018696	Bo_TT5b	1.4e-129	435.7	0.3	1.6e-129	435.6	0.3	1	1	234
		Bol044343	Bo_TT5c	7.6e-150	502.1	0.7	8.8e-150	501.9	0.7	1	1	251
	Brassica rapa	Bra003209	Br_TT5a	5.7e-127	427.2	10	4.3e-125	421	10	2	1	227
		Bra007142	Br_TT5b	1.6e-150	504.3	0.5	1.8e-150	504.1	0.5	1	1	251
		Bra017728	Br_TT5c	1e-110	374	1.2	1.1e-110	373.8	1.2	1	1	197
	Boechera stricta	Bostr.0697s0129.1	Bs_TT5	2.2e-150	503.8	0.8	2.5e-150	503.7	0.8	1	1	245
	Capsella grandiflora	Cagra.1742s0008.1	Cg_TT5	1.2e-146	491.6	1.5	1.3e-146	491.4	1.5	1	1	247
	Capsella rubella	Carubv10019455m	Cr_TT5	2.1e-147	494.1	1	2.3e-147	494	1	1	1	247
	Camelina sativa	Csa09g065990.1	Cs_TT5a	3e-130	437.9	0.5	3.3e-130	437.8	0.5	1	1	232
		Csa09g066000.1	Cs_TT5b	6.3e-127	427	1.4	7e-127	426.9	1.4	1	1	229
		Csa09g066040.1	Cs_TT5c	1.3e-144	484.9	1.9	1.5e-144	484.8	1.9	1	1	234
		Csa09g066060.1	Cs_TT5d	1.9e-128	432	0.3	2.1e-128	431.9	0.3	1	1	236
		Csa04g041330.1	Cs_TT5e	1.6e-111	376.6	3	9.9e-111	374	3	1.8	1	223
		Csa06g029660.1	Cs_TT5f	7.6e-119	400.6	1.1	8.4e-119	400.4	1.1	1	1	231
	Leavenworthia alabamica	LA_scaffold604_21	La_TT5a	8.1e-123	413.6	0.9	9e-123	413.4	0.9	1	1	227
		LA_scaffold604_22	La_TT5b	3.3e-143	480.4	0.8	3.7e-143	480.2	0.8	1	1	254
	Raphanus sativus L.	Rsa1.0_00447.1_g00010.1	Rs_TT5	6.4e-147	492.5	0.4	7.1e-147	492.4	0.4	1	1	247
	Sisymbrium irio	SI_scaffold1499_47	Si_TT5	6.9e-151	505.5	0.4	8e-151	505.3	0.4	1	1	251
	Schrenkiella parvula	c0007_00859	Sp_TT5	4.3e-147	493.1	0.4	4.9e-147	492.9	0.4	1	1	251
	Thellungiella halophila	Thhalv10010658m	Th_TT5	4.2e-150	502.9	0.5	4.9e-150	502.7	0.5	1.1	1	254
	Thellungiella salsuginea	Tsa5g07810	Ts_TT5	4.1e-150	503	0.5	4.8e-150	502.7	0.5	1.1	1	253
	Brassica juncea	ADB45305.1	Bj_TT5	/	/	/	/	/	/	/	/	252
TT6	Aethionema arabicum	AA_scaffold4356_13	Aa_TT6	2.1e-240	801.7	0	2.3e-240	801.5	0	1	1	359
	Arabidopsis lyrata	Al16047710	Al_TT6	9.9e-247	822.5	0	1.1e-246	822.4	0	1	1	358
	Arabidopsis thaliana	AT3G51240.1	At_TT6a	3e-247	824.2	0	3.3e-247	824.1	0	1	1	358
		AT3G51240.2	At_TT6b	1.6e-189	634.3	0	1.8e-189	634.2	0	1	1	274
	Brassica napus L.	BnaA03g41250D	Bn_TT6a	1e-239	799.5	0	1.1e-239	799.3	0	1	1	350
		BnaA09g31780D	Bn_TT6b	1.7e-247	825.1	0	1.9e-247	824.9	0	1	1	358
		BnaC07g32140D	Bn_TT6c	5.1e-239	797.2	0	5.7e-239	797	0	1	1	350
		BnaC08g22640D	Bn_TT6d	5.5e-247	823.4	0	6.1e-247	823.2	0	1	1	358
		BnaA04g04230D	Bn_TT6e	7.1e-112	378.9	0.1	6e-111	375.9	0.1	2.1	1	293
		BnaA09g55810D	Bn_TT6f	4.4e-121	409.2	0	1.9e-120	407.1	0	1.8	1	548
	Brassica oleracea	Bol002277	Bo_TT6a	5.1e-239	797.2	0	5.7e-239	797	0	1	1	350
		Bol044664	Bo_TT6b	5.4e-93	316.8	0.1	3.6e-92	314.1	0.1	1.9	1	236
		Bol010585	Bo_TT6c	8e-247	822.8	0	9e-247	822.7	0	1	1	358
	Brassica rapa	Bra012862	Br_TT6a	8.9e-237	789.8	0	9.9e-237	789.6	0	1	1	350
		Bra036828	Br_TT6b	8.9e-247	822.7	0	1e-246	822.5	0	1	1	358
		Bra007813	Br_TT6c	4.4e-121	409.2	0	1.9e-120	407.1	0	1.8	1	548
		Bra014831	Br_TT6d	1.3e-140	473.4	0	2.7e-140	472.4	0	1.6	1	322
	Boechera stricta	Bostr.6864s0123.1	Bs_TT6	3.4e-248	827.3	0	3.8e-248	827.2	0	1	1	358
	Capsella grandiflora	Cagra.0926s0087.1	Cg_TT6	2.9e-245	817.7	0	3.3e-245	817.5	0	1	1	360
	Capsella rubella	Carubv10018698m	Cr_TT6	1.1e-245	819.1	0	1.2e-245	818.9	0	1	1	360
	Camelina sativa	Csa04g037020.1	Cs_TT6a	1.8e-234	782.2	0	2e-234	782	0	1	1	352
		Csa06g025400.1	Cs_TT6b	1.6e-243	811.9	0	1.8e-243	811.8	0	1	1	355
		Csa09g058220.1	Cs_TT6c	1e-241	806	0	1.1e-241	805.9	0	1	1	361
	Leavenworthia alabamica	LA_C68043_1	La_TT6	4.8e-246	820.3	0	5.4e-246	820.1	0	1	1	358
	Raphanus sativus L.	Rsa1.0_00369.1_g00022.1	Rs_TT6a	1e-239	799.4	0	1.2e-239	799.3	0	1	1	368
		Rsa1.0_26893.1_g00001.1	Rs_TT6b	2.4e-165	554.8	0	2.7e-165	554.6	0	1	1	240
	Sisymbrium irio	SI_scaffold2535_18	Si_TT6a	9.2e-246	819.3	0.4	1.2e-244	815.7	0	2.3	1	467
		SI_scaffold916_21	Si_TT6b	2.5e-155	521.8	0	3.4e-155	521.4	0	1.2	1	312
	Schrenkiella parvula	c0007_00535	Sp_TT6a	1.8e-243	811.8	0	2e-243	811.6	0	1	1	358
		c0009_00344	Sp_TT6b	8.7e-155	520.1	0	3.3e-154	518.1	0	1.7	1	313
		c0595_00001	Sp_TT6c	8.7e-155	520.1	0	3.3e-154	518.1	0	1.7	1	313
	Thellungiella halophila	Thhalv10010399m	Th_TT6a	9e-246	819.4	10.8	7.7e-242	806.4	3.4	3.3	2	428
		Thhalv10010444m	Th_TT6b	7.9e-216	720.9	11.6	8.3e-212	707.6	4.1	3.3	2	383
	Thellungiella salsuginea	Tsa5g11700	Ts_TT6	8.8e-246	819.4	10.8	7.6e-242	806.4	3.4	3.3	2	428
TT7	Aethionema arabicum	AA_scaffold6407_66	Aa_TT7	0	1086.9	0	0	1086.4	0	1.2	1	687
	Arabidopsis halleri	Araha.2167s0008.1	Ah_TT7	1.2e-246	824.5	0	1.3e-246	824.3	0	1	1	364
	Arabidopsis lyrata	Al16060829	Al_TT7	0	1144.9	0	0	1144.7	0	1	1	514
	Arabidopsis thaliana	AT5G07990.1	At_TT7	0	1145.1	0	0	1145	0	1	1	513
	Brassica napus L.	BnaA10g23330D	Bn_TT7a	0	1167.1	0	0	1166.9	0	1	1	511
		BnaC09g47980D	Bn_TT7b	0	1610.2	0.1	1.1e-247	827.9	0	2	2	717
	Brassica oleracea	Bol043829	Bo_TT7	0	1170.9	0	0	1170.7	0	1	1	511
	Brassica rapa	Bra009312	Br_TT7	0	1169.2	0	0	1169	0	1	1	511
	Boechera stricta	Bostr.13129s0168.1	Bs_TT7	0	1146.6	0	0	1146.4	0	1	1	513
	Capsella grandiflora	Cagra.1365s0004.1	Cg_TT7	0	1153.6	0	0	1153.5	0	1	1	509
	Capsella rubella	Carubv10000754m	Cr_TT7	0	1151.4	0	0	1151.3	0	1	1	509
	Camelina sativa	Csa08g056450.1	Cs_TT7a	0	1153.5	0	0	1153.4	0	1	1	509
		Csa13g009960.1	Cs_TT7b	0	1153.7	0	0	1153.5	0	1	1	509
		Csa20g010390.1	Cs_TT7c	0	1154.7	0	0	1154.5	0	1	1	509
	Leavenworthia alabamica	LA_C62727_4	La_TT7a	4.6e-232	776.4	0	5.1e-232	776.2	0	1	1	338
		LA_scaffold397_19	La_TT7b	0	1145.5	0	0	1145.3	0	1	1	509
	Raphanus sativus L.	Rsa1.0_00058.1_g00035.1	Rs_TT7	0	1167.7	0	0	1167.5	0	1	1	511
	Sisymbrium irio	SI_scaffold2075_85	Si_TT7	0	1137.9	0	0	1137.8	0	1	1	517
	Schrenkiella parvula	c0002_02035	Sp_TT7	0	1140.9	0	0	1140.8	0	1	1	514
	Thellungiella halophila	Thhalv10013289m	Th_TT7	0	1155.7	0	0	1155.5	0	1	1	510
	Thellungiella salsuginea	Tsa6g38200	Ts_TT7	0	1155.7	0	0	1155.6	0	1	1	510
TT8	Aethionema arabicum	AA_scaffold1554_4	Aa_TT8	4.3e-268	895.2	0.3	4.9e-268	895.1	0.3	1	1	613
	Arabidopsis halleri	Araha.0776s0003.1	Ah_TT8	0	1084.5	10.2	0	1084.3	10.2	1	1	520
	Arabidopsis lyrata	Al16058047	Al_TT8	0	1095.9	11.2	0	1095.7	11.2	1	1	518
	Arabidopsis thaliana	AT4G09820.1	At_TT8	0	1088.9	10.1	0	1088.7	10.1	1	1	518
	Brassica napus L.	BnaA09g22810D	Bn_TT8a	0	1052.5	8.1	0	1052.4	8.1	1	1	521
		BnaC09g24870D	Bn_TT8b	0	1047.3	7.2	0	1047.1	7.2	1	1	521
	Brassica oleracea	Bol004077	Bo_TT8	0	1049.8	6.9	0	1049.7	6.9	1	1	516
	Brassica rapa	Bra037887	Br_TT8	1.1e-292	976.3	21.5	4.4e-291	971.1	21.5	2	1	497
	Boechera stricta	Bostr.25463s0338.1	Bs_TT8	0	1075.7	8.8	0	1075.6	8.8	1	1	515
	Capsella grandiflora	Cagra.1664s0001.1	Cg_TT8	0	1051.6	12.3	0	1051.5	12.3	1	1	520
	Capsella rubella	Carubv10002462m	Cr_TT8	0	1050.3	12.5	0	1050.1	12.5	1	1	520
	Camelina sativa	Csa02g028180.1	Cs_TT8a	0	1025.3	9.2	0	1025.1	9.2	1	1	507
		Csa08g037600.1	Cs_TT8b	0	1072.7	10.2	0	1072.6	10.2	1	1	515
		Csa08g037600.2	Cs_TT8c	0	1079.5	9.8	0	1079.4	9.8	1	1	510
		Csa13g044750.1	Cs_TT8d	0	1068.9	13	0	1068.7	13	1.1	1	521
		Csa13g044750.2	Cs_TT8e	0	1075.7	12.6	0	1075.4	12.6	1.1	1	516
	Leavenworthia alabamica	LA_scaffold1110_7	La_TT8a	0	1023	7.8	0	1022.9	7.8	1	1	510
		LA_scaffold3074_3	La_TT8b	9.4e-299	996.4	10.3	1.1e-298	996.1	10.3	1	1	504
	Raphanus sativus L.	Rsa1.0_06196.1_g00001.1	Rs_TT8	1.9e-285	952.5	21.4	7.5e-284	947.2	21.4	2	1	498
	Sisymbrium irio	SI_scaffold388_27	Si_TT8	0	1008.9	15.6	3.3e-302	1007.8	15.6	1.5	1	505
	Schrenkiella parvula	c0028_00071	Sp_TT8	0	1064.2	6.6	0	1064	6.6	1	1	517
	Thellungiella halophila	Thhalv10028584m	Th_TT8	0	1097.2	9.5	0	1097.1	9.5	1	1	514
	Thellungiella salsuginea	Tsa6g09440	Ts_TT8	0	1097.2	9.5	0	1097.1	9.5	1	1	514
TT10	Aethionema arabicum	AA_scaffold2393_52	Aa_TT10	2e-298	996.2	12.4	6.1e-266	889	3.1	2	2	519
	Arabidopsis halleri	Araha.3944s0002.1	Ah_TT10	0	1220.3	9	0	1220.1	9	1	1	564
	Arabidopsis lyrata	Al16053781	Al_TT10	0	1220.6	9	0	1220.5	9	1	1	564
	Arabidopsis thaliana	AT5G48100.1	At_TT10	0	1231.7	8.4	0	1231.6	8.4	1	1	565
	Brassica napus L.	BnaA06g30430D	Bn_TT10a	0	1226.8	9.6	0	1226.6	9.6	1	1	560
		BnaAnng08030D	Bn_TT10b	0	1220.2	9.5	0	1220	9.5	1	1	559
		BnaC02g38340D	Bn_TT10c	0	1244.5	10.3	0	1244.4	10.3	1	1	563
	Brassica oleracea	Bol033117	Bo_TT10	0	1244.5	10.3	0	1244.4	10.3	1	1	563
	Brassica rapa	Bra020720	Br_TT10a	0	1217.9	10	0	1217.7	10	1	1	559
		Bra037510	Br_TT10b	0	1211.2	9.8	0	1211	9.8	1	1	565
	Boechera stricta	Bostr.5224s0008.1	Bs_TT10	0	1235.2	9.8	0	1235.1	9.8	1	1	564
	Capsella grandiflora	Cagra.3449s0002.1	Cg_TT10	0	1212.2	7.9	0	1212	7.9	1	1	564
	Capsella rubella	Carubv10027828m	Cr_TT10	0	1203.5	7.4	0	1203.4	7.4	1	1	564
	Camelina sativa	Csa02g032320.1	Cs_TT10a	0	1217.2	9.3	0	1217.1	9.3	1	1	564
		Csa11g074190.1	Cs_TT10b	0	1222.8	8.1	0	1222.7	8.1	1	1	564
		Csa18g014140.1	Cs_TT10c	0	1068	5.9	0	1067.8	5.9	1	1	489
	Leavenworthia alabamica	LA_scaffold690_12	La_TT10	0	1166.2	11.7	0	1166.1	11.7	1	1	559
	Raphanus sativus L.	Rsa1.0_02333.1_g00002.1	Rs_TT10	0	1213.5	8.4	0	1213.4	8.4	1	1	559
	Sisymbrium irio	SI_scaffold688_265	Si_TT10	0	1247	9.8	0	1246.9	9.8	1	1	564
	Schrenkiella parvula	c0003_01124	Sp_TT10	0	1260	0.8	0	1260	0.8	1.1	1	1676
	Thellungiella halophila	Thhalv10003921m	Th_TT10	0	1220.8	9.3	0	1220.7	9.3	1	1	562
	Thellungiella salsuginea	Tsa2g23380	Ts_TT10	0	1220.8	9.3	0	1220.7	9.3	1	1	562
TT12	Aethionema arabicum	AA_scaffold2401_74	Aa_TT12	0	1041.1	40.7	0	1040.9	40.7	1	1	507
	Arabidopsis halleri	Araha.10825s0005.1	Ah_TT12	0	1120.2	40.9	0	1120	40.9	1	1	507
	Arabidopsis lyrata	Al16062732	Al_TT12	0	1112.8	42.9	0	1112.7	42.9	1	1	507
	Arabidopsis thaliana	AT3G59030.1	At_TT12	0	1119.6	40.2	0	1119.4	40.2	1	1	507
	Brassica napus L.	BnaA07g18120D	Bn_TT12a	0	1117.2	39	0	1117	39	1	1	507
		BnaC06g17050D	Bn_TT12b	0	1121	38.4	0	1120.8	38.4	1	1	507
	Brassica oleracea	Bol023767	Bo_TT12	0	1117.9	38.8	0	1117.7	38.8	1	1	507
	Brassica rapa	Bra003361	Br_TT12	0	1119.5	38.3	0	1119.4	38.3	1	1	507
	Boechera stricta	Bostr.20903s0135.1	Bs_TT12	0	1102	39.9	0	1101.9	39.9	1	1	507
	Capsella grandiflora	Cagra.0216s0010.1	Cg_TT12	0	1117.6	38.5	0	1117.5	38.5	1	1	508
	Capsella rubella	Carubv10018603m	Cr_TT12	0	1115.2	37.9	0	1115	37.9	1	1	508
	Camelina sativa	Csa04g046530.1	Cs_TT12a	0	1125.5	38.3	0	1125.3	38.3	1	1	507
		Csa04g046540.1	Cs_TT12b	0	1116.1	38.3	0	1116	38.3	1	1	513
		Csa04g046540.2	Cs_TT12c	0	1126.7	37.6	0	1126.5	37.6	1	1	507
		Csa05g089560.1	Cs_TT12d	0	1177.4	59.5	5.6e-280	934.4	30.7	3	3	560
		Csa05g089560.2	Cs_TT12e	0	1088.9	33.2	0	1088.7	33.2	1	1	519
	Leavenworthia alabamica	LA_scaffold909_19	La_TT12	0	1100.3	38.9	0	1100.1	38.9	1	1	507
	Raphanus sativus L.	Rsa1.0_02494.1_g00005.1	Rs_TT12	0	1118.5	39.2	0	1118.3	39.2	1	1	507
	Sisymbrium irio	SI_scaffold2478_76	Si_TT12	0	1115.6	39.4	0	1115.5	39.4	1	1	507
	Schrenkiella parvula	c0007_01155	Sp_TT12	0	1099.6	35.7	0	1099.4	35.7	1	1	522
	Thellungiella halophila	Thhalv10005907m	Th_TT12	0	1122.3	39.3	0	1122.2	39.3	1	1	507
	Thellungiella salsuginea	Tsa5g04020	Ts_TT12	0	1090.7	41.9	0	1090.4	41.9	1	1	515
TT15	Aethionema arabicum	AA_scaffold6112_9	Aa_TT15	0	1157.7	0.3	6.2e-182	611.6	0.4	2	2	569
	Arabidopsis halleri	Araha.14256s0004.1	Ah_TT15	3.1e-297	992.5	0.4	2.7e-295	986.1	0.4	2	1	473
	Arabidopsis lyrata	Al16065540	Al_TT15	0	1388.4	0	0	1388.3	0	1	1	625
	Arabidopsis thaliana	AT1G43620.1	At_TT15a	0	1354.6	0	0	1354.5	0	1	1	615
		AT1G43620.2	At_TT15b	0	1354.6	0	0	1354.5	0	1	1	615
		AT1G43620.3	At_TT15c	0	1354.6	0	0	1354.5	0	1	1	615
	Brassica napus L.	BnaA10g09020D	Bn_TT15a	0	1310.6	0	0	1310.4	0	1	1	616
		BnaA10g28120D	Bn_TT15b	0	1343.7	0	0	1343.5	0	1	1	624
	Brassica oleracea	Bol006969	Bo_TT15	0	1310.6	0	0	1310.4	0	1	1	616
	Brassica rapa	Bra036926	Br_TT15	0	1014.3	0	2.4e-266	890.5	0	2	2	498
	Boechera stricta	Bostr.12302s0033.1	Bs_TT15a	0	1399.3	0	0	1399.1	0	1	1	624
		Bostr.12302s0033.2	Bs_TT15b	0	1399.3	0	0	1399.1	0	1	1	624
		Bostr.12302s0033.3	Bs_TT15c	0	1399.3	0	0	1399.1	0	1	1	624
	Capsella grandiflora	Cagra.17705s0001.1	Cg_TT15	0	1379.5	0	0	1379.4	0	1	1	620
	Capsella rubella	Carubv10008593m	Cr_TT15	0	1374.8	0	0	1374.7	0	1	1	620
	Camelina sativa	Csa03g046600.1	Cs_TT15a	0	1575.5	0	0	1274.1	0	2	2	764
		Csa14g048830.1	Cs_TT15b	0	1395.4	0	0	1395.3	0	1	1	624
		Csa17g069450.1	Cs_TT15c	0	1401.9	0	0	1401.8	0	1	1	624
	Leavenworthia alabamica	LA_scaffold1019_35	La_TT15	0	1188.7	0	6.6e-178	598.3	0	2	2	864
	Raphanus sativus L.	Rsa1.0_00030.1_g00048.1	Rs_TT15	2.4e-290	969.8	0	2.8e-290	969.5	0	1	1	631
	Sisymbrium irio	SI_scaffold515_16	Si_TT15	0	1336.6	0	0	1336.4	0	1	1	620
	Schrenkiella parvula	c0008_00906g	Sp_TT15	0	1026.2	0.6	1.2e-162	547.9	0	2.4	2	607
	Thellungiella halophila	Thhalv10005442m	Th_TT15	0	1283	0	0	1282.8	0	1	1	618
	Thellungiella salsuginea	Tsa1g32630	Ts_TT15	0	1357.9	0	0	1357.7	0	1	1	628
TT16	Aethionema arabicum	AA_scaffold229_182	Aa_TT16	2.1e-114	386.5	12.6	1.1e-113	384.2	12.6	1.8	1	241
	Arabidopsis halleri	Araha.6226s0002.1	Ah_TT16	1.1e-152	511.8	9.3	1.3e-152	511.6	9.3	1	1	290
	Arabidopsis lyrata	Al16049986	Al_TT16	5.4e-155	519.4	11.1	6.2e-155	519.2	11.1	1	1	254
	Arabidopsis thaliana	AT5G23260.1	At_TT16a	4.4e-147	493.5	8.9	4.9e-147	493.3	8.9	1	1	247
		AT5G23260.2	At_TT16b	4.4e-153	513.2	10.4	5e-153	513	10.4	1	1	252
		AT5G23260.3	At_TT16c	4.9e-136	457.3	14	2.6e-135	455	14	1.8	1	238
	Brassica napus L.	BnaA03g39500D	Bn_TT16a	1.8e-150	504.6	8.4	2e-150	504.4	8.4	1	1	240
		BnaA09g05410D	Bn_TT16b	4.1e-150	503.5	9.9	4.8e-150	503.2	9.9	1.1	1	318
		BnaAnng30140D	Bn_TT16c	2.4e-147	494.4	6.8	2.6e-147	494.3	6.8	1	1	242
		BnaC02g41690D	Bn_TT16d	1.5e-148	498.4	7.7	1.6e-148	498.2	7.7	1	1	242
		BnaC02g42240D	Bn_TT16e	2.5e-153	514	10.1	2.7e-153	513.8	10.1	1	1	242
		BnaC09g04950D	Bn_TT16f	9.4e-149	499	9.6	1e-148	498.8	9.6	1	1	245
	Brassica oleracea	Bol017090	Bo_TT16a	2.8e-153	513.8	10.1	3.2e-153	513.6	10.1	1	1	251
		Bol036252	Bo_TT16b	9.4e-149	499	9.6	1e-148	498.8	9.6	1	1	245
		Bol020634	Bo_TT16c	6e-105	355.5	13.5	6.6e-105	355.4	13.5	1	1	183
	Brassica rapa	Bra013028	Br_TT16a	1.8e-150	504.6	8.4	2e-150	504.4	8.4	1	1	240
		Bra029365	Br_TT16b	2.4e-147	494.4	6.8	2.6e-147	494.3	6.8	1	1	242
		Bra026507	Br_TT16c	1.1e-144	485.6	8.6	1.3e-144	485.4	8.6	1.1	1	313
	Boechera stricta	Bostr.10199s0104.1	Bs_TT16	2.1e-155	520.8	10.6	2.4e-155	520.6	10.6	1	1	267
	Capsella grandiflora	Cagra.4348s0011.1	Cg_TT16	2.6e-150	504.1	14.7	2.9e-150	503.9	14.7	1	1	268
	Capsella rubella	Carubv10002792m	Cr_TT16	1.5e-146	491.8	13.5	1.6e-146	491.6	13.5	1	1	244
	Camelina sativa	Csa08g017610.1	Cs_TT16a	1.5e-150	504.8	12.7	1.7e-150	504.7	12.7	1	1	262
		Csa13g027840.1	Cs_TT16b	4.6e-130	437.8	7.2	5.2e-130	437.6	7.2	1	1	219
		Csa20g038200.1	Cs_TT16c	1e-152	512	10.2	1.1e-152	511.8	10.2	1	1	262
		Csa20g038200.2	Cs_TT16d	8e-153	512.3	10.2	8.9e-153	512.2	10.2	1	1	246
	Leavenworthia alabamica	LA_scaffold1544_8	La_TT16a	1.8e-149	501.3	13.7	2.1e-149	501.1	13.7	1	1	275
		LA_scaffold576_13	La_TT16b	2.3e-146	491.2	8.7	2.6e-146	491	8.7	1	1	278
	Raphanus sativus L.	Rsa1.0_00302.1_g00016.1	Rs_TT16a	8.8e-153	512.2	9.3	9.9e-153	512	9.3	1	1	241
		Rsa1.0_05545.1_g00001.1	Rs_TT16b	4.4e-146	490.2	8.5	4.9e-146	490.1	8.5	1	1	242
	Sisymbrium irio	SI_scaffold1547_144	Si_TT16	3.1e-137	461.2	10.8	1.7e-136	458.9	10.8	1.8	1	230
	Schrenkiella parvula	c0003_00643	Sp_TT16	2.9e-137	461.4	10.2	1.5e-136	459	10.2	1.8	1	244
	Thellungiella halophila	Thhalv10005641m	Th_TT16	7.5e-148	496	5.8	8.4e-148	495.9	5.8	1	1	238
	Thellungiella salsuginea	Tsa2g29020	Ts_TT16	6.9e-154	515.8	7.2	7.7e-154	515.7	7.2	1	1	243
TT18	Aethionema arabicum	AA_scaffold6109_17	Aa_TT18	4.5e-237	790.8	0.8	5.3e-237	790.6	0.8	1	1	382
	Arabidopsis halleri	Araha.10415s0019.1	Ah_TT18	9.9e-244	812.7	1.2	1.1e-243	812.6	1.2	1	1	356
	Arabidopsis lyrata	Al16059755	Al_TT18	1.5e-243	812.1	1.3	1.7e-243	812	1.3	1	1	356
	Arabidopsis thaliana	AT4G22880.1	At_TT18a	2.7e-242	808	1.5	3.1e-242	807.8	1.5	1	1	356
		AT4G22880.2	At_TT18b	2.7e-242	808	1.5	3.1e-242	807.8	1.5	1	1	356
	Brassica napus L.	BnaA01g12530D	Bn_TT18a	2.1e-244	815	1.1	2.3e-244	814.8	1.1	1	1	358
		BnaA03g45610D	Bn_TT18b	2.9e-242	807.9	1.5	3.3e-242	807.7	1.5	1	1	393
		BnaC01g14310D	Bn_TT18c	3e-244	814.4	2.3	3.4e-244	814.2	2.3	1	1	358
		BnaC07g37670D	Bn_TT18d	2.1e-243	811.7	1.5	2.3e-243	811.5	1.5	1	1	358
	Brassica oleracea	Bol014986	Bo_TT18a	3e-244	814.4	2.3	3.4e-244	814.2	2.3	1	1	358
		Bol042059	Bo_TT18b	2.3e-241	804.9	1.3	2.6e-241	804.8	1.3	1	1	358
	Brassica rapa	Bra013652	Br_TT18a	9e-245	816.1	1.2	1e-244	816	1.2	1	1	358
		Bra019350	Br_TT18b	1.1e-242	809.3	1	1.2e-242	809.2	1	1	1	357
	Boechera stricta	Bostr.7867s0076.1	Bs_TT18	1.1e-243	812.5	0.6	1.3e-243	812.4	0.6	1	1	356
	Capsella grandiflora	Cagra.6745s0002.1	Cg_TT18	5.8e-242	806.9	2.2	5.8e-242	806.9	2.2	2.1	1	416
	Capsella rubella	Carubv10004921m	Cr_TT18	1.8e-242	808.6	2.6	1.8e-242	808.6	2.6	2.1	1	416
	Camelina sativa	Csa10g020210.1	Cs_TT18a	2.6e-242	808	0.6	2.9e-242	807.9	0.6	1	1	356
		Csa11g023230.1	Cs_TT18b	4.1e-236	787.7	0.6	4.6e-236	787.5	0.6	1	1	351
		Csa12g033810.1	Cs_TT18c	1.3e-243	812.4	0.8	1.4e-243	812.2	0.8	1	1	356
	Leavenworthia alabamica	LA_scaffold1127_11	La_TT18a	1e-220	737	5.5	1.1e-219	733.6	5.5	1.9	1	363
		LA_scaffold2926_4	La_TT18b	1.8e-239	798.7	2.4	2.1e-239	798.5	2.4	1	1	365
	Raphanus sativus L.	Rsa1.0_00248.1_g00011.1	Rs_TT18a	1.1e-238	796.1	1.2	1.2e-238	795.9	1.2	1	1	357
		Rsa1.0_00473.1_g00015.1	Rs_TT18b	6.6e-243	810	1.4	7.6e-243	809.8	1.4	1	1	363
	Sisymbrium irio	SI_scaffold101_3	Si_TT18	1.7e-243	811.9	1.1	1.9e-243	811.7	1.1	1	1	358
	Schrenkiella parvula	c0006_01185	Sp_TT18	2.6e-241	804.7	0.7	2.9e-241	804.6	0.7	1	1	356
	Thellungiella halophila	Thhalv10025559m	Th_TT18	3.2e-245	817.6	1.9	3.6e-245	817.4	1.9	1	1	358
	Thellungiella salsuginea	Tsa7g21670	Ts_TT18	3.2e-245	817.6	1.9	3.6e-245	817.5	1.9	1	1	358
	Brassica juncea	ACH58397.1	Bj_TT18	/	/	/	/	/	/	/	/	358
TT19	Aethionema arabicum	AA_scaffold2718_31	Aa_TT19	7.6e-118	397	0	8.6e-118	396.8	0	1.1	1	372
	Arabidopsis halleri	Araha.10007s0011.1	Ah_TT19	2.4e-132	444.3	0.1	2.7e-132	444.2	0.1	1	1	214
	Arabidopsis lyrata	Al16064783	Al_TT19	9.7e-134	448.9	0.1	1.1e-133	448.7	0.1	1	1	214
	Arabidopsis thaliana	AT5G17220.1	At_TT19	2.1e-131	441.3	0.1	2.3e-131	441.1	0.1	1	1	214
	Brassica napus L.	BnaA02g03440D	Bn_TT19a	1.4e-138	464.7	0.3	1.6e-138	464.5	0.3	1	1	215
		BnaA10g17440D	Bn_TT19b	1e-135	455.3	0.4	1.1e-135	455.2	0.4	1	1	213
		BnaC02g07090D	Bn_TT19c	9.7e-136	455.4	0.5	1.1e-135	455.3	0.5	1	1	214
		BnaC02g07110D	Bn_TT19d	3.4e-135	453.7	0	3.4e-135	453.7	0	1.1	1	342
		BnaC09g40740D	Bn_TT19e	2.7e-135	454	0.2	3e-135	453.8	0.2	1	1	213
	Brassica oleracea	Bol019821	Bo_TT19a	1.3e-135	455.1	0.2	1.4e-135	454.9	0.2	1	1	213
		Bol021325	Bo_TT19b	6.8e-138	462.5	0.4	7.6e-138	462.3	0.4	1	1	215
	Brassica rapa	Bra008570	Br_TT19a	1e-135	455.3	0.4	1.1e-135	455.2	0.4	1	1	213
		Bra023602	Br_TT19b	9.8e-138	461.9	0.3	1.1e-137	461.8	0.3	1	1	215
	Boechera stricta	Bostr.2618s0057.1	Bs_TT19	6.5e-134	449.5	0.1	7.3e-134	449.3	0.1	1	1	214
	Capsella grandiflora	Cagra.2098s0067.1	Cg_TT19	2.4e-118	398.6	0.2	2.7e-118	398.4	0.2	1	1	214
	Capsella rubella	Carubv10002680m	Cr_TT19	1.1e-131	442.2	0.1	1.2e-131	442	0.1	1	1	215
	Camelina sativa	Csa08g009380.1	Cs_TT19a	2.1e-134	451	0.1	2.4e-134	450.9	0.1	1	1	214
		Csa13g019980.1	Cs_TT19b	4.5e-134	450	0.1	5e-134	449.8	0.1	1	1	214
		Csa20g025280.1	Cs_TT19c	8.2e-134	449.1	0.1	9.1e-134	449	0.1	1	1	214
	Leavenworthia alabamica	LA_scaffold216_11	La_TT19a	2.2e-135	454.3	0.2	2.5e-135	454.1	0.2	1	1	214
		LA_scaffold2180_23	La_TT19b	6.5e-133	446.2	0.3	7.3e-133	446	0.3	1	1	214
	Raphanus sativus L.	Rsa1.0_00047.1_g00007.1	Rs_TT19a	6.6e-133	446.2	0.3	7.3e-133	446	0.3	1	1	213
		Rsa1.0_00240.1_g00012.1	Rs_TT19b	5.6e-135	452.9	0.4	6.2e-135	452.8	0.4	1	1	213
	Sisymbrium irio	SI_scaffold843_129	Si_TT19	1e-135	455.4	0	1e-135	455.4	0	1.1	1	439
	Schrenkiella parvula	c0002_01321	Sp_TT19	3.7e-135	453.5	0.3	4.1e-135	453.4	0.3	1	1	215
	Thellungiella halophila	Thhalv10014654m	Th_TT19	1.1e-134	452	0.3	1.2e-134	451.8	0.3	1	1	214
	Thellungiella salsuginea	Tsa6g29770	Ts_TT19	1.1e-134	452	0.3	1.2e-134	451.8	0.3	1	1	214
TTG1	Aethionema arabicum	AA_scaffold6434_21	Aa_TTG1	4.6e-230	767.7	3.7	5.2e-230	767.5	3.7	1	1	344
	Arabidopsis halleri	Araha.0138s0001.1	Ah_TTG1	1.3e-240	802.4	3.9	1.4e-240	802.3	3.9	1	1	341
	Arabidopsis lyrata	Al16052502	Al_TTG1	4.2e-240	800.7	3.5	4.7e-240	800.5	3.5	1	1	341
	Arabidopsis thaliana	AT5G24520.1	At_TTG1a	4.7e-241	803.8	3.9	5.2e-241	803.7	3.9	1	1	341
		AT5G24520.2	At_TTG1b	4.7e-241	803.8	3.9	5.2e-241	803.7	3.9	1	1	341
		AT5G24520.3	At_TTG1c	4.7e-241	803.8	3.9	5.2e-241	803.7	3.9	1	1	341
	Brassica napus L.	BnaC07g29950D	Bn_TTG1a	2.1e-160	538.6	1.9	2.5e-160	538.4	1.9	1	1	238
		BnaA02g32510D	Bn_TTG1b	2.1e-50	176.9	0.9	1.4e-47	167.6	0.9	2	1	120
	Brassica oleracea	Bol022420	Bo_TTG1	3.9e-231	771.2	3.4	4.4e-231	771	3.4	1	1	337
	Brassica rapa	Bra009770	Br_TTG1a	1.1e-230	769.7	2.8	1.3e-230	769.5	2.8	1	1	337
		Bra029411	Br_TTG1b	1.6e-51	180.6	1	1.1e-48	171.2	1	2	1	120
	Boechera stricta	Bostr.5763s0072.1	Bs_TTG1	3.5e-242	807.5	4.1	3.9e-242	807.4	4.1	1	1	344
	Capsella grandiflora	Cagra.3892s0001.1	Cg_TTG1	4.3e-243	810.5	4.2	4.8e-243	810.4	4.2	1	1	344
	Capsella rubella	Carubv10001339m	Cr_TTG1	1.6e-242	808.6	4.5	1.8e-242	808.5	4.5	1	1	344
	Camelina sativa	Csa08g019020.1	Cs_TTG1a	1.4e-244	815.4	3.7	1.6e-244	815.3	3.7	1	1	344
		Csa13g029180.1	Cs_TTG1b	0	1214	11.4	1.4e-219	733.2	1.9	2	2	521
		Csa20g040950.1	Cs_TTG1c	1.4e-244	815.4	3.7	1.6e-244	815.3	3.7	1	1	344
	Leavenworthia alabamica	LA_scaffold1613_45	La_TTG1a	2.5e-234	781.7	3.4	2.8e-234	781.5	3.4	1	1	339
		LA_scaffold204_7	La_TTG1b	1.9e-251	838	11	1.7e-214	716.5	3	2	2	377
	Raphanus sativus L.	Rsa1.0_01247.1_g00006.1	Rs_TTG1	7.5e-224	747.3	3	8.3e-224	747.1	3	1	1	335
	Sisymbrium irio	SI_scaffold2223_6	Si_TTG1	2.6e-237	791.5	2.3	2.9e-237	791.3	2.3	1	1	344
	Schrenkiella parvula	c0003_00735	Sp_TTG1	8.5e-196	655	0.3	9.4e-196	654.9	0.3	1	1	279
	Thellungiella halophila	Thhalv10004515m	Th_TTG1	1.8e-239	798.6	3.6	2.1e-239	798.4	3.6	1	1	343
	Thellungiella salsuginea	Tsa2g27960	Ts_TTG1	1.8e-239	798.6	3.6	2e-239	798.4	3.6	1	1	343
TTG2	Aethionema arabicum	AA_scaffold5205_41	Aa_TTG2	5.4e-186	623.7	28.8	2.9e-184	618	28.8	2	1	384
	Arabidopsis halleri	Araha.14169s0010.1	Ah_TTG2a	5.1e-273	910.5	23.7	5.7e-273	910.3	23.7	1	1	425
		Araha.14169s0010.2	Ah_TTG2b	5.1e-273	910.5	23.7	5.7e-273	910.3	23.7	1	1	425
	Arabidopsis lyrata	Al16057471	Al_TTG2	3.4e-270	901.1	23.2	4.1e-270	900.9	23.2	1	1	433
	Arabidopsis thaliana	AT2G37260.1	At_TTG2a	9.1e-271	903	23.3	1e-270	902.9	23.3	1	1	429
		AT2G37260.2	At_TTG2b	1.7e-225	753.9	23.9	1.9e-225	753.7	23.9	1	1	347
	Brassica napus L.	BnaA05g07220D	Bn_TTG2a	2.8e-227	759.8	18.3	3.8e-227	759.3	18.3	1.2	1	398
		BnaC04g08020D	Bn_TTG2b	2.2e-233	779.8	23.4	2.5e-233	779.7	23.4	1	1	402
		BnaA03g17120D	Bn_TTG2c	2.9e-174	585.1	21.6	7.8e-113	382.7	10.9	2	2	323
		BnaA03g17130D	Bn_TTG2d	1.1e-174	586.4	20.7	3.1e-113	384	10	2	2	323
		BnaC03g20650D	Bn_TTG2e	3.9e-172	578.1	20.8	6.5e-113	383	9.7	2	2	322
	Brassica oleracea	Bol025535	Bo_TTG2a	5.8e-236	788.4	25.6	6.5e-236	788.2	25.6	1	1	407
		Bol005555	Bo_TTG2b	9.5e-175	586.7	19.2	2e-114	387.9	9.6	2	2	319
		Bol025215	Bo_TTG2c	8.9e-24	89.3	4.8	3.9e-20	77.3	0.2	2	2	114
	Brassica rapa	Bra005210	Br_TTG2a	2.1e-240	803	23.7	2.3e-240	802.8	23.7	1	1	409
		Bra023112	Br_TTG2b	1.8e-252	842.8	24.7	2e-252	842.6	24.7	1	1	420
	Boechera stricta	Bostr.23794s0358.1	Bs_TTG2a	2.3e-277	924.8	24.9	2.6e-277	924.6	24.9	1	1	429
		Bostr.23794s0358.2	Bs_TTG2b	1.3e-274	915.7	25.6	1.5e-274	915.5	25.6	1	1	427
	Capsella grandiflora	Cagra.0666s0018.1	Cg_TTG2a	3.9e-271	904.3	24	4.3e-271	904.1	24	1	1	427
		Cagra.0666s0018.2	Cg_TTG2b	2.2e-268	895.2	24.6	2.4e-268	895	24.6	1	1	425
	Capsella rubella	Carubv10023273m	Cr_TTG2a	7.7e-273	909.9	24.1	8.6e-273	909.7	24.1	1	1	426
		Carubv10023278m	Cr_TTG2b	4.4e-270	900.8	24.8	4.9e-270	900.6	24.8	1	1	424
	Camelina sativa	Csa04g050830.1	Cs_TTG2a	1.1e-271	906.1	23.8	1.2e-271	905.9	23.8	1	1	428
		Csa05g016590.1	Cs_TTG2b	7.1e-271	903.4	25.3	7.9e-271	903.2	25.3	1	1	431
		Csa06g039950.1	Cs_TTG2c	3.9e-270	900.9	25.2	4.4e-270	900.8	25.2	1	1	431
	Leavenworthia alabamica	LA_scaffold547_42	La_TTG2	2.9e-251	838.8	20.2	3.3e-251	838.6	20.2	1	1	432
	Raphanus sativus L.	Rsa1.0_00296.1_g00006.1	Rs_TTG2	1.3e-247	826.7	24.8	1.5e-247	826.5	24.8	1	1	420
	Sisymbrium irio	SI_scaffold2366_12	Si_TTG2	3.7e-65	225.6	18.7	7.7e-63	218	18.7	2.2	1	429
	Schrenkiella parvula	c0004_01027	Sp_TTG2	1.7e-237	793.4	18.7	5e-195	653.5	11.5	2	2	400
	Thellungiella halophila	Thhalv10016692m	Th_TTG2	7.7e-272	906.6	24.6	8.6e-272	906.4	24.6	1	1	429
	Thellungiella salsuginea	Tsa4g22490	Ts_TTG2	7.6e-272	906.6	24.6	8.5e-272	906.4	24.6	1	1	429
AHA10	Aethionema arabicum	AA_scaffold4402_53	Aa_AHA10a	0	2191.1	2.6	0	2191	2.6	1	1	934
		AA_scaffold5525_52	Aa_AHA10b	0	2189.5	3.4	0	2189.3	3.4	1	1	985
	Arabidopsis halleri	Araha.2722s0008.1	Ah_AHA10	0	2188.2	2.5	0	2188	2.5	1	1	947
	Arabidopsis thaliana	AT1G17260.1	At_AHA10	0	2188	4.3	0	2187.9	4.3	1	1	947
	Brassica napus L.	BnaA08g23220D	Bn_AHA10a	0	2186.6	3	0	2186.4	3	1	1	944
		BnaC08g17280D	Bn_AHA10b	0	2175.9	4.3	0	2175.7	4.3	1	1	944
	Brassica oleracea	Bol029307	Bo_AHA10	0	2175.9	4.3	0	2175.7	4.3	1	1	944
	Brassica rapa	Bra016610	Br_AHA10	0	2159.7	2.8	0	2159.6	2.8	1	1	944
	Boechera stricta	Bostr.7128s0336.1	Bs_AHA10	0	2169.7	2	0	2169.5	2	1	1	947
	Capsella grandiflora	Cagra.0824s0094.1	Cg_AHA10	0	2156.8	3.8	0	2156.6	3.8	1	1	947
	Capsella rubella	Carubv10008225m	Cr_AHA10	0	2155.6	3.3	0	2155.4	3.3	1	1	947
	Camelina sativa	Csa03g021030.1	Cs_AHA10a	0	2145.7	0.2	0	2145.6	0.2	1	1	925
		Csa14g021480.1	Cs_AHA10b	0	2132.7	1.3	0	2132.5	1.3	1	1	918
		Csa17g022960.1	Cs_AHA10c	0	2118.7	2.9	0	2118.6	2.9	1	1	970
	Leavenworthia alabamica	LA_scaffold951_17	La_AHA10	0	2091	4.4	0	2090.9	4.4	1	1	991
	Raphanus sativus L.	Rsa1.0_00153.1_g00022.1	Rs_AHA10	0	2076.5	3.4	0	2076.4	3.4	1	1	944
	Sisymbrium irio	SI_scaffold1491_231	Si_AHA10	0	2003	10.3	0	1997.7	10.3	2	1	957
	Schrenkiella parvula	c0001_01342	Sp_AHA10	0	2157.8	3.5	0	2157.6	3.5	1	1	953
	Thellungiella halophila	Thhalv10006710m	Th_AHA10	0	1673.7	2.2	0	1673.4	2.2	1	1	954
	Thellungiella salsuginea	Tsa1g15420	Ts_AHA10	0	1673.1	0.3	0	1672.8	0.3	1	1	954
BAN	Aethionema arabicum	AA_scaffold3953_90	Aa_BAN	1.9e-227	763.4	1.5	2.1e-227	763.2	1.5	1	1	342
	Arabidopsis halleri	Araha.34654s0003.1	Ah_BAN	5.1e-160	540.1	0.7	5.6e-160	540	0.7	1	1	216
	Arabidopsis lyrata	Al16039728	Al_BAN	3.9e-255	855	1.8	4.4e-255	854.8	1.8	1	1	342
	Arabidopsis thaliana	AT1G61720.1	At_BAN	2.8e-255	855.5	2.5	3.2e-255	855.3	2.5	1	1	340
	Brassica napus L.	BnaA01g36200D	Bn_BANa	2.3e-241	809.4	0.4	2.6e-241	809.2	0.4	1	1	338
		BnaA03g60670D	Bn_BANb	2.3e-255	855.8	2.6	2.6e-255	855.6	2.6	1	1	345
		BnaC01g29820D	Bn_BANc	1e-240	807.3	0.4	1.1e-240	807.1	0.4	1	1	338
		BnaC04g18950D	Bn_BANd	1.3e-252	846.6	1.7	1.5e-252	846.5	1.7	1	1	342
	Brassica oleracea	Bol013776	Bo_BANa	9.3e-228	764.4	0.2	1e-227	764.2	0.2	1	1	328
		Bol035407	Bo_BANb	1.3e-252	846.6	1.7	1.5e-252	846.5	1.7	1	1	342
	Brassica rapa	Bra021318	Br_BANa	9.9e-255	853.7	2.6	1.1e-254	853.5	2.6	1	1	345
		Bra031403	Br_BANb	9.3e-242	810.7	0.4	1e-241	810.6	0.4	1	1	338
	Boechera stricta	Bostr.10040s0011.1	Bs_BAN	6.1e-257	861	2.5	6.8e-257	860.8	2.5	1	1	342
	Capsella grandiflora	Cagra.8164s0009.1	Cg_BAN	2.4e-255	855.7	2.1	2.7e-255	855.5	2.1	1	1	342
	Capsella rubella	Carubv10022026m	Cr_BAN	2.4e-255	855.7	2.1	2.7e-255	855.5	2.1	1	1	342
	Camelina sativa	Csa09g096260.1	Cs_BANa	0	1401.9	14.4	5.2e-235	788.4	1.3	3	3	633
		Csa16g053480.1	Cs_BANb	1e-249	837.1	0.4	1.1e-249	836.9	0.4	1	1	341
		Csa07g062960.1	Cs_BANc	1.6e-210	707.3	1.1	1.9e-210	707	1.1	1	1	584
	Leavenworthia alabamica	LA_scaffold1372_7	La_BANa	1.6e-240	806.6	2.7	1.8e-240	806.4	2.7	1	1	344
		LA_scaffold1599_9	La_BANb	6.9e-248	831	1.9	7.7e-248	830.9	1.9	1	1	342
	Raphanus sativus L.	Rsa1.0_00185.1_g00021.1	Rs_BANa	1.7e-236	793.3	0.2	1.9e-236	793.1	0.2	1	1	351
		Rsa1.0 00405.1 g00016.1	Rs_BANb	0	1387.3	12	3.9e-214	719.3	0.4	3	3	316
	Sisymbrium irio	SI_scaffold357_11	Si_BAN	0	2429.7	12.1	0	2429.5	12.1	1	1	1041
	Schrenkiella parvula	c0015_00412	Sp_BANa	8.1e-261	873.8	1.9	9.1e-261	873.7	1.9	1	1	346
		c0692_00002	Sp_BANb	8.1e-261	873.8	1.9	9.1e-261	873.7	1.9	1	1	346
	Thellungiella halophila	Thhalv10023567m	Th_BAN	3e-262	878.5	4.1	3.4e-262	878.4	4.1	1	1	346
	Thellungiella salsuginea	Tsa2g03800	Ts_BAN	3e-262	878.6	4.1	3.3e-262	878.4	4.1	1	1	346
UGT2	Aethionema arabicum	AA_scaffold391_2	Aa_UGT2a	8.8e-268	893.6	0	1.1e-267	893.3	0	1	1	480
		AA_scaffold6229_11	Aa_UGT2b	9.8e-280	933	0	1.1e-279	932.8	0	1	1	476
		AA_scaffold6229_10	Aa_UGT2c	2.5e-282	941.5	0	2.8e-282	941.4	0	1	1	479
	Arabidopsis halleri	Araha.11664s0004.1	Ah_UGT2a	7.5e-178	597	0	9.2e-178	596.7	0	1	1	319
		Araha.12478s0003.1	Ah_UGT2b	5e-87	297.5	6.2	2.4e-43	153.4	0.1	2.8	2	204
	Arabidopsis lyrata	Al16042170	Al_UGT2a	5.5e-280	933.8	0	6.1e-280	933.7	0	1	1	480
		Al16060993	Al_UGT2b	0	1016.1	0	0	1015.9	0	1	1	480
		Al16051411	Al_UGT2c	9.5e-245	817.6	0	1.8e-244	816.7	0	1.4	1	455
	Arabidopsis thaliana	AT1G01420.1	At_UGT2a	6.2e-276	920.5	0	7e-276	920.3	0	1	1	481
		AT4G01070.1	At_UGT2b	0	1018.1	0	0	1018	0	1	1	480
		AT4G01070.2	At_UGT2c	4.8e-215	719.7	0	5.8e-215	719.4	0	1	1	349
	Brassica napus L.	BnaA02g20270D	Bn_UGT2a	1.6e-278	929	0.4	2e-188	631.9	0	2	2	459
		BnaC02g27750D	Bn_UGT2b	1.7e-279	932.2	0.4	7.1e-189	633.4	0	2	2	460
		BnaCnng01870D	Bn_UGT2c	1.3e-276	922.7	0.7	2.2e-274	915.3	0.7	2	1	462
		BnaA09g00210D	Bn_UGT2d	1.6e-32	117.7	0.3	1.8e-32	117.6	0.3	1	1	84
		BnaC03g31760D	Bn_UGT2e	6e-179	600.6	0.1	1.5e-178	599.4	0.1	1.5	1	307
		BnaA10g00520D	Bn_UGT2f	1.5e-272	909.3	0	1.7e-272	909.1	0	1	1	483
		BnaC05g00580D	Bn_UGT2g	2.6e-271	905.2	0	2.9e-271	905.1	0	1	1	483
	Brassica oleracea	Bol010781	Bo_UGT2a	2.3e-292	974.7	0	2.6e-292	974.5	0	1	1	478
		Bol011466	Bo_UGT2b	2.8e-299	997.5	0	3.1e-299	997.3	0	1	1	481
		Bol040645	Bo_UGT2c	3.9e-288	960.7	0.2	5.5e-287	956.9	0.2	1.9	1	474
		Bol040647	Bo_UGT2d	8.2e-301	1002.5	0	9.2e-301	1002.3	0	1	1	483
		Bol040697	Bo_UGT2e	1.7e-273	912.4	0	1.9e-273	912.2	0	1	1	483
	Brassica rapa	Bra000942	Br_UGT2a	1.2e-191	642.5	0	1.3e-191	642.4	0	1	1	321
		Bra008535	Br_UGT2b	1.4e-291	972.1	0.3	1.9e-290	968.3	0.3	1.9	1	474
		Bra008540	Br_UGT2c	7.7e-300	999.3	0	8.7e-300	999.1	0	1	1	482
		Bra037386	Br_UGT2d	9.5e-300	999	0	1.1e-299	998.8	0	1	1	481
		Bra033266	Br_UGT2e	8.4e-269	896.9	0	1e-268	896.7	0	1	1	566
	Boechera stricta	Bostr.7365s0059.1	Bs_UGT2	0	1023.7	0	0	1023.5	0	1	1	480
	Capsella grandiflora	Cagra.1372s0016.1	Cg_UGT2	0	1008.3	0	0	1008.1	0	1	1	480
	Capsella rubella	Carubv10003907m	Cr_UGT2	1.4e-301	1005.1	0	1.6e-301	1004.9	0	1	1	480
	Camelina sativa	Csa02g002220.1	Cs_UGT2a	0	1027.8	0	0	1027.6	0	1	1	562
		Csa05g014510.1	Cs_UGT2b	1.1e-261	873.5	0	1.2e-261	873.3	0	1	1	472
		Csa08g053440.1	Cs_UGT2c	4.9e-271	904.3	2.6	2.2e-212	710.9	0	2	2	448
		Csa13g056280.1	Cs_UGT2d	0	1023.5	0	0	1023.3	0	1	1	480
	Leavenworthia alabamica	LA_scaffold600_20	La_UGT2a	2.9e-257	858.9	0	3.2e-257	858.8	0	1	1	471
		LA_scaffold272_92	La_UGT2b	2.4e-225	753.6	0.7	9.6e-191	639.5	0	2	2	374
	Raphanus sativus L.	Rsa1.0_00187.1_g00015.1	Rs_UGT2a	8e-290	966.3	0	8.9e-290	966.1	0	1	1	481
		Rsa1.0_00511.1_g00010.1	Rs_UGT2b	1.5e-270	902.7	0	1.7e-270	902.5	0	1	1	478
		Rsa1.0_02791.1_g00005.1	Rs_UGT2c	1.7e-297	991.6	0	1.9e-297	991.4	0	1	1	481
	Sisymbrium irio	SI_scaffold2065_76	Si_UGT2a	1.2e-300	1001.9	0	1.4e-300	1001.8	0	1	1	482
		SI_scaffold2233_40	Si_UGT2b	5.7e-233	778.8	1.1	2.9e-188	631.3	0	2	2	422
	Schrenkiella parvula	c0001_00075	Sp_UGT2a	4.1e-273	911.2	0	5e-273	910.9	0	1	1	476
		c0011_00098	Sp_UGT2b	1.2e-298	995.4	0	1.4e-298	995.2	0	1	1	481
		c0059_00010	Sp_UGT2c	1.2e-298	995.4	0	1.4e-298	995.2	0	1	1	481
	Thellungiella halophila	Thhalv10028623m	Th_UGT2a	0	1018.6	0	0	1018.4	0	1	1	480
		Thhalv10010005m	Th_UGT2b	7.9e-276	920.1	0	8.9e-276	919.9	0	1	1	482
	Thellungiella salsuginea	Tsa6g01090	Ts_UGT2a	0	1018.6	0	0	1018.4	0	1	1	480
		Tsa1g00870	Ts_UGT2b	7.8e-276	920.1	0	8.9e-276	920	0	1	1	482
